# Supplementary material for: Afatinib combined with anti-PD1 enhances immunotherapy of hepatocellular carcinoma via ERBB2/STAT3/PD-L1 signaling
Source: Front Oncol. 2023 May 30;13:1198118. doi: 10.3389/fonc.2023.1198118 (PMC10266343; doi:10.3389/fonc.2023.1198118)
Supplement: Supplementary file 1 [file Table_1.xlsx]

## Sheet: Sheet1
	%				%				%				%				%				%				%				%				%				%
Axitinib	0.918939			Gefitinib (ZD1839)	0.905028			Sorafenib Tosylate	0.869665			Crizotinib (PF-02341066)	0.906033			Docetaxel	0.869162			Anastrozole	1.2486			Cladribine	1.01866			Methotrexate	1.18358			Letrozole	1.31128			Entecavir Hydrate	1.10614
Roxadustat (FG-4592)	0.939385			Imatinib Mesylate (STI571)	0.758548			Sunitinib Malate	0.770447			Vismodegib (GDC-0449)	0.80933			Paclitaxel	0.772793			Aprepitant	0.844023			Decitabine	0.74933			Bendamustine HCl	0.933184			Temozolomide	0.825921			Nepafenac	0.806481
Nintedanib (BIBF 1120)	0.766424			Lapatinib (GW-572016) Ditosylate	0.934357			Temsirolimus (CCI-779, NSC 683864)	0.769106			Belinostat (PXD101)	0.675587			Capecitabine	0.827766			Bicalutamide	0.806984			Dutasteride	0.876536			Epirubicin HCl	0.560447			Tamoxifen	0.856257			Rufinamide	0.757542
Afatinib (BIBW2992)	0.487877			Lenalidomide (CC-5013)	0.928491			Vorinostat (SAHA, MK0683)	0.735251			Rucaparib (AG-014699,PF-01367338) phosphate	0.467352			Lenvatinib (E7080)	0.767933			Fulvestrant	0.884916			Melatonin	0.757206			Etoposide	0.798268			Vincristine sulfate	0.720503			Posaconazole	0.704245
Bortezomib (PS-341)	0.624302			Panobinostat (LBH589)	0.737766			Entinostat (MS-275)	0.84838			Cabozantinib (XL184, BMS-907351)	0.863296			Valproic acid sodium salt (Sodium valproate)	0.85609			Raltitrexed	0.88676			Bisoprolol fumarate	0.806815			Raloxifene HCl	0.986648			Agomelatine	0.860279			Prasugrel	0.75352
Bosutinib (SKI-606)	0.688827			Nilotinib (AMN-107)	0.945084			Enzastaurin (LY317615)	0.760056			Everolimus (RAD001)	0.828603			Regorafenib (BAY 73-4506)	0.708436			Thalidomide	0.818715			Tivozanib (AV-951)	0.716983			Fludarabine Phosphate	0.83095			Leflunomide	0.837486			Ramelteon	0.717989
Dasatinib	0.772793			Pazopanib HCl (GW786034 HCl)	0.880056			Olaparib (AZD2281, Ku-0059436)	0.478994			Malotilate	0.859776			Danoprevir (ITMN-191)	0.89095			Exemestane	0.813184			Doxorubicin (Adriamycin) HCl	0.601676			Topotecan HCl	0.775308			Enzalutamide (MDV3100)	0.751341			Cinacalcet HCl	0.834302
Ridaforolimus (Deforolimus, MK-8669)	0.948269			Rapamycin (Sirolimus)	0.924302			Masitinib (AB1010)	0.83229			Ivacaftor (VX-770)	1.14			Ritonavir	1.06676			Finasteride	1.18961			Fluorouracil (5-Fluoracil, 5-FU)	1.23101			2-Methoxyestradiol (2-MeOE2)	1.13028			Dienogest	1.13832			Celecoxib	0.462217
Ketorolac	0.899624			Enalaprilat Dihydrate	0.995941			Aminoglutethimide	0.952553			Ipratropium Bromide	1.11584			Hydrocortisone	0.946072			Deferasirox	0.798805			Azathioprine	1.05733			Meloxicam	0.48139			Nevirapine	1.04887			Pitavastatin Calcium	0.99072
Adenosine	0.794305			Dofetilide	0.802946			Aminophylline	0.819329			Sulfanilamide	0.729673			Desonide	0.786563			Piroxicam	0.684664			Indomethacin	0.494572			Mesna	1.24331			NEXIUM (esomeprazole magnesium)	1.28705			Rifapentine	1.14465
Zolmitriptan	0.806367			Isradipine	0.865598			Lubiprostone	0.82419			Betamethasone Dipropionate	0.703748			Didanosine	0.760639			Gemcitabine	0.414075			Terbinafine	1.47825			Methocarbamol	1.41524			Nicotinic Acid	2.25887			Suprofen	1.59491
Telbivudine	0.843273			Estrone	0.873879			Amorolfine HCl	0.759379			Meprednisone	0.790884			Divalproex Sodium	0.728773			Glipizide	0.675843			Levonorgestrel	1.35205			Prednisolone	1.2154			Nimodipine	1.17363			Pyrazinamide	1.23124
Monobenzone	0.918527			Flucytosine	0.896563			Chloramphenicol	0.806726			Betamethasone Valerate	0.766759			Emtricitabine	0.755598			Glyburide (Glibenclamide)	0.93581			Gemfibrozil	1.41092			Telmisartan	1.21882			Nisoldipine	1.10486			Quetiapine Fumarate	1.16121
Tretinoin	0.899083			Trichlormethiazide	0.888462			Flurbiprofen	0.775761			Praziquantel	0.842734			Progesterone	0.737595			Fomepizole	0.743715			Indapamide	2.29866			Thiabendazole	1.22098			Octocrylene	1.23772			Rifampin	1.19578
Phenylbutazone	0.984419			Loteprednol etabonate	0.898544			Disulfiram	0.82653			Busulfan	1.07156			Lamivudine	0.685205			Adefovir Dipivoxil	0.768019			Mitotane	2.22664			Guaifenesin	1.56755			Oxybutynin	1.24115			Cefditoren Pivoxil	1.25033
Ezetimibe	1.02619							Mesalamine	0.972177			Carbamazepine	0.862537			Estradiol	0.745335			Zalcitabine	0.849574			Methylprednisolone	0.931669			Rifabutin	1.00314			Enoxacin	0.979378			Sulfadiazine	0.941571
Clindamycin palmitate HCl	0.671343			Buflomedil HCl	0.905921			Clinofibrate	0.855872			Canagliflozin	0.82383			Dabrafenib (GSK2118436)	0.918901			Alogliptin（SYK-322）benzoate	0.798923			Icotinib	0.747587			Amoxicillin	0.750627			Fenoprofen calcium hydrate	0.707828			Cinepazide maleate	0.970121
L-Thyroxine	0.866981			Fluocinonide	0.786644			Ciprofibrate	0.775769			Alectinib (CH5424802)	0.782318			MPEP	0.688299			Camostat Mesilate	0.806406			Carbazochrome sodium sulfonate (AC-17)	0.845932			Aspirin	0.881248			Linagliptin	0.856691			Otilonium Bromide	0.808044
Gliclazide	0.804535			Inulin	0.854703			Dolutegravir (GSK1349572)	0.815996			MK-2048	0.70011			Alpelisib (BYL719)	0.615797			Prucalopride	0.691105			Clevudine	0.741623			Niflumic acid	0.740921			Vildagliptin (LAF-237)	0.675202			Bosentan Hydrate	0.781616
Acemetacin	0.821492			Lonidamine	0.837162			Trametinib (GSK1120212)	0.692041			Laquinimod	0.726772			Clindamycin	0.688299			Acesulfame Potassium	0.685843			Rivaroxaban	0.730748			Ciclopirox ethanolamine	0.645733			Daunorubicin HCl	0.350347			Rupatadine Fumarate	0.692392
Tioxolone	0.744546			Clorsulon	0.854118			Ibrutinib (PCI-32765)	0.583756			Tofacitinib (CP-690550,Tasocitinib)	0.676606			Epiandrosterone	0.722211			Cobicistat (GS-9350)	0.780095			Prostaglandin E2 (PGE2)	0.709348			Rimonabant	0.650294			Pravastatin sodium	0.702098			Azelnidipine	0.582002
Dehydroepiandrosterone (DHEA)	0.743027			Arecoline HBr	0.764777			Nilvadipine	0.768168			Istradefylline	0.616382			Apalutamide?(ARN-509)	0.713324			S-Ruxolitinib (INCB018424)	0.659298			Paroxetine HCl	0.668186			Cabazitaxel	0.539788			Bepotastine Besilate	0.686545			Alverine Citrate	0.638367
Idebenone	0.736478			Noradrenaline bitartrate monohydrate	0.652633			Dacomitinib (PF299804, PF299)	0.739752			Torcetrapib	0.675553			Baricitinib (LY3009104, INCB028050)	0.651697			Lumiracoxib	0.672161			Zaltoprofen	0.673097			Bufexamac	0.695082			Fosaprepitant dimeglumine salt	0.604805			Azilsartan Medoxomil	0.656258
Mifepristone	0.650995			Fostamatinib (R788)	0.605038			Niraparib (MK-4827)	0.482075			Sofosbuvir (PSI-7977, GS-7977)	0.659065			Carfilzomib (PR-171)	0.463894			Pirfenidone	0.717183			Pazopanib	0.731333			Lamotrigine	0.678944			Rofecoxib	0.713441			Medetomidine HCl	0.687129
Bleomycin sulfate	0.967738			Chlorhexidine?2HCl	0.910568			Atovaquone	0.951627			Pyridoxine HCl	0.933436			Biotin (Vitamin B7)	0.921309			Entacapone	0.887526			Tylosin tartrate	0.929971			Brinzolamide	0.901733			Ropinirole HCl	1.02318			Iopromide	0.98333
Clofarabine	1.02803			Piracetam	0.967911			Etravirine (TMC125)	0.926333			Vitamin C	0.956824			Sulfamerazine	1.00672			Estradiol valerate	0.972416			Benztropine mesylate	0.972416			Carbenicillin disodium	1.0677			Ticarcillin sodium	1.12071			Fexofenadine HCl	1.16991
Dacarbazine	1.02751			Vanillin	0.99667			Ulipristal	1.0483			Sulfathiazole	0.95821			Sulfamethazine	1.04691			Articaine HCl	0.950414			Altrenogest	0.950414			Eletriptan HBr	0.997882			Azlocillin sodium salt	1.1247			Moclobemide (Ro 111163)	1.18914
Dexrazoxane HCl (ICRF-187, ADR-529)	1.0308			Chlorthalidone	0.942618			Indacaterol Maleate	1.00117			Oxybutynin chloride	0.999268			Sodium salicylate	1.0632			Gliquidone	0.97744			Ampicillin sodium	0.97744			Flumequine	0.942791			Reboxetine mesylate	1.05523			Triptolide (PG490)	0.824986
Epinephrine HCl	1.0405			Dexmedetomidine	0.999442			2-Thiouracil	1.01781			Doxepin HCl	0.974495			Methylthiouracil	0.973802			Butenafine HCl	1.00343			Anagrelide HCl	1.00343			Amitriptyline HCl	1.06025			Triflusal	1.03704			Borneol	1.12244
Diclofenac Potassium	1.00637							Moguisteine	1.11569			Ornidazole	0.961675							Mepivacaine HCl	1.03582			Antipyrine	1.03582			Adrenalone HCl	0.978479			Trifluoperazine 2HCl	1.08121			Fangchinoline	0.907277
Diclofenac Diethylamine	1.02092			Tazobactam	0.997536			Nadifloxacin	1.09975			Dexamethasone Acetate	0.995284			Milnacipran HCl	0.943657			Ethynodiol diacetate	0.999095			Atomoxetine HCl	0.999095			Azatadine dimaleate	0.962541			Catharanthine	1.02404			Berbamine (dihydrochloride)	1.10148
Naloxone HCl	1.03738			Beclomethasone dipropionate	1.00654			Pidotimod	0.955958			Trimethoprim	1.08398			Darifenacin HBr	1.01867			Sertaconazole nitrate	0.961329			Betahistine 2HCl	0.961329			(+,-)-Octopamine HCl	0.90641			Meptazinol HCl	0.909182			(+)-Fangchinoline	0.783234
Levothyroxine sodium	0.89445			Cinnamaldehyde	0.881572			Echinacoside	0.869966			Imperatorin	0.881732			Panaxatriol	0.831174			Harmine	0.766467			Isopsoralen	0.83499			Hederacoside C	0.865992			Nonivamide	0.855658			(+)-Borneol	0.829425
Sodium benzoate	1.01448			Tanshinone IIA sulfonate (sodium)	0.91639			Notoginsenoside R1	0.864243			Scutellarin	0.858996			D-Galactose	0.917026			Guaiacol	1.00606			Bornyl acetate	0.981574			Lathyrol	0.951208			Valproic acid	1.028			Vanillyl Butyl Ether	1.02291
Quinidine sulfate	1.01655			Palmatine	0.998426			Carvacrol	0.962814			Ginsenoside Re	0.939443			Glucosamine sulfate	1.03531			Indigo	0.998903			Sophoridine	0.972671			Ginsenoside Rg1	0.936263			L-Cycloserine	0.986025			Nifuratel	0.971717
4-Hydroxybenzoic acid	0.993498			5-Hydroxymethylfurfural	0.922114			Succinic acid	0.980302			Harmine hydrochloride	0.821794			Camphor	0.895404			Scopoletin	1.00113			Hydroxy Camptothecine	0.735942			Ginsenoside Rb1	0.981733			Mesterolone	0.95709			Flavone	1.00479
Betaine	1.00669			Tyrosol	0.93992			Palmitic acid	0.896676			Quercitrin	0.911621			Tetrahydropalmatine hydrochloride	1.06043			Protopine	0.844051			Hederagenin	0.981097			(-)-Epicatechin gallate	0.93992				0			Histamine	1.07076
Methyl salicylate	0.790315			Ligustrazine hydrochloride	0.915436			Trigonelline Hydrochloride	0.877439			Loganin	0.928314			Allantoin	0.895086			Pyrogallol	0.90383			Astragaloside IV	0.911461			Forsythin	0.896517			Maltitol	0.945643			Veratric acid	0.987933
Sinomenine hydrochloride	0.986502			cis-Anethole	0.952798			Stevioside	0.938012			Isoquercitrin	0.952321			Lawsone	0.882049			L-Rhamnose monohydrate	0.937376			Catalpol	0.958839			Swertiamarin	0.943258			Tannic acid	0.962654			Vindoline	1.03865
Eucalyptol	0.93976			Ginkgolide C	1.00049			Dehydroandrographolide	0.914006			Madecassoside	0.973466			Galanthamine	0.897311			Arteether	0.913369			α-Hederin	0.916072			Liquiritin	0.901128			Gamma-Oryzanol	0.872033			Fusidine	0.945007
Parecoxib	0.853717			Rebeprazole sodium	0.859213			Gluconolactone	0.882907			Rivastigmine	0.870965			Vitamin K1	0.91494			Evans Blue	0.850683			Perphenazine	0.898449			Sulfacetamide sodium salt hydrate	0.862436			Harmaline	0.896364			Daminozide	0.88556
Eslicarbazepine Acetate	0.943372			Sivelestat sodium tetrahydrate	0.975026			Povidone iodine	1.0027			Deoxycholic acid	0.983934			Etretinate	1.03871			Isatin	0.981849			Retigabine	1.07075			Cisapride hydrate	1.02431			Menadiol Diacetate	0.976353			Thymidine	1.07283
Hydroquinidine	1.03151			Lidocaine hydrochloride	0.945646			Terazosin HCl	0.938254			Escin	0.929156			2-Deoxy-D-glucose	0.885371			Acetylcholine iodide	0.907737			Retigabine 2HCl	0.944319			Corticosterone	0.935221			Benzyl isothiocyanate	0.989621			Ceftizoxime	0.989432
Glycopyrrolate	1.00952			Procaine	0.926691			Protirelin	0.904514			Oxybenzone	0.861866			Eugenol	0.893711			(+)-Catechin	0.909822			Salvianolic acid B	0.979954			Betulin	0.964411			N-Acetylneuraminic acid	0.993032			Cefuroxime axetil	0.99417
Tiagabine hydrochloride	1.00099			Benzocaine hydrochloride	0.851632			Loxoprofen	0.878736			Guanfacine Hydrochloride	0.841964			Oleic Acid	0.877788			(-)Epicatechin	0.926312			Trapidil	0.830591			Dihydrotestosterone(DHT)	0.922142			Drostanolone Propionate	0.938633			L-Cysteine HCl	0.932757
Atazanavir	0.944699			Etonogestrel	0.880443			Sildenafil Mesylate	0.867364			D panthenol	0.861298			Latanoprost	0.854474			Benzenesulfonamide	0.932757			Psoralen	0.837036			p-Coumaric Acid	0.834383			Trenbolone acetate	0.933705			Diatrizoate sodium	0.840638
Fusidate Sodium	0.945267			Hydroxyprogesterone caproate	0.84367			Efavirenz	0.838932			CarbinoxaMine Maleate	0.875324			Esculetin	0.882528			Lauric Acid	0.843481			Ondansetron Hydrochloride Dihydrate	0.783205			Melibiose	0.851062			Methandrostenolone	0.857507			Atenolol	0.82718
Molsidomine	0.931431			Tiagabine	0.848219			Vitamin E	0.887645			Saxagliptin hydrate	0.842912			(-)-Menthol	0.812395			Cinnarizine	0.795715			Citalopram HBr	0.812585			L-5-Hydroxytryptophan	0.826611			Nicergoline	0.762924			Saccharin	0.795336
Diastase	1.04554			Ibudilast	1.0245			Faropenem Sodium	1.01729			Iproniazid	1.05141			Sulfamethoxazole sodium	1.02734			Cefathiamidine	0.961378			Cytosine	1.01957			Maltol	0.934652			Iminostilbene	1.14296			Tiamulin fumarate	1.89205
Maltose	1.14031			Acotiamide hydrochloride	1.18011			Dalbavancin	1.14069			TriacetonaMine	1.10468			Cefodizime Sodium	1.09236			Calcium Dobesilate	1.0317			Elagolix Sodium	0.934463			Nonanoic acid	0.942424			Fimasartan	1.14164			Valpromide	1.55921
Piperonyl butoxide	1.2004			Mosapride	1.17955			Levocetirizine Dihydrochloride	1.11491			Indole-3-carboxylic acid	1.10657			Pyridoxal 5-phosphate monohydrate	1.08951			Lynestrenol	1.0806			Sulfogaiacol	0.952849			Fumaric acid	1.09311			Sulfalene(SMPZ)	1.2093			Methylcobalamin	1.43904
Tolmetin	1.28057			Laurocapram	1.13879			Flucloxacillin sodium	1.05217			Squalene	1.13235			Cefazedone	1.07719			Taurolidine	1.03587			Propiverine hydrochloride	1.0734			Usnic acid	1.00592			Efonidipine	0.888214			Tavaborole (AN-2690)	1.48093
Cefoxitin sodium	1.31261			Potassium acetate	1.18675			Tafluprost	1.07378			Cefetamet pivoxil hydrochloride	1.14694			Cephapirin Benzathine	1.06601			Menbutone	1.0317			Proxyphylline	0.991138			Linalool	1.0008			Azathramycin	0.963842			Avermectin B1(Abamectin)	1.48889
Propantheline bromide	1.22731			Cefcapene Pivoxil Hydrochloride	1.23053			Gadopentetate Dimeglumine	1.12079			Nicarbazin	1.1767			Robenidine Hydrochoride	1.07738			Nikethamide	1.02582							Glycocholic acid	1.05994			Anamorelin	1.01123			Tofacitinib (CP-690550) Citrate	1.56944
Aceclofenac	1.24759			Rabeprazole	1.24702			Ecabet sodium	1.23262			Propacetamol hydrochloride	1.18827			Eperisone hydrochloride	1.17879			Perospirone hydrochloride	1.13159			Asunaprevir	1.20362			Lactobionic acid	1.07947			Sorbic acid	0.917214			Fingolimod (FTY720) HCl	1.52585
Nilutamide	1.164			Meropenem Trihydrate	1.21727			Bedaquiline fumarate	1.18827			Xanthinol Nicotinate	1.19225			Neticonazole Hydrochloride	1.15983			Bifendate	1.13235			cis-Aconitic acid	1.15472			Buparvaquone	1.03265							Tacrolimus (FK506)	1.74307
Pimecrolimus	0.972824			Ioversol	0.980553			Efinaconazole	0.958867			Phenazine methosulfate	1.10379			Thiocolchicoside	1.03745			Daclatasvir Digydrochloride	1.00696							Ceforanide	1.06042			Febantel	1.05656			Lanolin	1.11689
Cefotiam hydrochloride	1.09263			Crisaborole (AN2728)	1.03444			Mebeverine Hydrochloride	1.03036			Valethamate Bromide	1.02736			Granisetron	1.05076			Trelagliptin succinate	1.05828			Donepezil	1.07781			Vitamin K2	1.08318			Rafoxanide	1.10873			Tylosin	1.23691
Teprenone	1.11539			Simeprevir	1.00868			4-Aminopyridine	1.00653			Actarit	0.965095			Rifamycin sodium salt	0.961015			Ganciclovir sodium	0.972609			Argatroban Monohydrate	1.01297			Lentinan	1.03358			SulfadiMethoxine sodium	1.04861			Ademetionine	1.15403
Delamanid	1.57958			Isoprinosine	0.986994			Etofylline	0.979694			Tiamulin	0.996226			Milbemycin Oxime	0.935895			Pramipexole dihydrochloride	0.969818			Acotiamide	1.01319			Carbazochrome	0.98635							alpha-Arbutin	1.06171
Brivudine	1.31334			Oxyclozanide	0.962518			Dihydralazine sulphate	1.02886			Difloxacin hydrochloride	0.963807			Dinoprost tromethamine	0.938042			Losartan	1.04389			Xipamide	1.03552			Azamethiphos	0.82661			Pralidoxime Iodide	0.964665			Propyl gallate	0.996871
Indometacin Sodium	1.08576			Indobufen	0.9827			Mephenesin	0.941692			Bevantolol hydrochloride	0.920007			Revaprazan Hydrochloride	0.951568			Dabrafenib Mesylate	0.925374			Regorafenib Monohydrate	0.920007			p-Anisaldehyde	0.878998			Stachyose	0.925374			Hydroquinine	1.02543
				Tilorone dihydrochloride	0.736219			Terconazole	0.916786			Benorylate	0.916357			Pixantrone Maleate	0.657423			Mupirocin calcium	0.896175			Osimertinib mesylate	0.767137			Tianeptine	0.836701			lutein	0.864827			Doramectin	0.914424
Octenidine Dihydrochloride	0.778516			Nadolol	0.796337			Melitracen hydrochloride	0.843787			Clonixin	0.846578			Metadoxine	0.874489			Duloxetine	0.902186			Sitagliptin	0.879213			Geranyl acetate	0.905836			Proanthocyanidins	0.880071			Olivetol	0.970462
Nitisinone	0.761117			Nerolidol	0.723046			Butoconazole	0.806498			Ethoxyquin	0.781066			Betrixaban maleate	0.809848			Dasabuvir(ABT-333)	0.733401			Sultamicillin	0.740863			Carbaryl	0.748629			Hyperoside	0.760964			Dantrolene sodium	0.652995
Dolasetron	0.856751			Cefpodoxime proxetil	0.783655			Diflorasone	0.86132			Ajmaline	0.975533			Mepivacaine	0.812893			Ombitasvir (ABT-267)	0.917056			Ertugliflozin	0.966244			Promazine hydrochloride	0.921777			Saikosaponin D	0.602589			Cloperastine hydrochloride	0.759594
Meisoindigo	0.811675			Cefmetazole sodium	0.933503			Bendazac	0.998985			Methyl Aminolevulinate Hydrochloride	1.05137			Cyclofenil	0.853553			Paritaprevir (ABT-450)	0.9833			Diflucortolone valerate	0.937614			Metoprolol	0.963808			Curculigoside	0.768579			Clidinium Bromide	0.804365
Gamithromycin	0.955584			Cefminox Sodium	0.969137			Pikamilone	1.00371			Dibutyl phthalate	1.00858			Phenolphthalein	0.925431			Propylparaben	0.840914							Quinacrine Dihydrochloride Dihydrate	0.592385			Aucubin	1.01574			Molindone hydrochloride	0.846396
Ceftezole sodium	0.977361			Cefpiramide sodium	0.948122			Alogliptin	0.980863			Dimethyl phthalate	1.06492			Chlorhexidine	0.733553			Sultamicillin Tosylate	0.85599			Metyrapone	0.981777			Berberine Sulfate	0.753959			Saikosaponin A	0.824467			Prilocaine hydrochloride	0.934264
Sulbenicillin Sodium	0.940812			Ceftiofur	0.969898			Fipronil	0.96868			Formate	0.963959			Nefazodone hydrochloride	0.92467			Squalane	0.954061			Parecoxib Sodium	0.921777			Triprolidine Hydrochloride	0.998223			Pivmecillinam hydrochloride	1.0168			Tribenzagan Hydrochloride	0.895736
Metroprolol succinate	0.960456			Safinamide	0.944772			Ethyl Oleate	0.992132			Imidafenacin	1.00873			Chlorprothixene hydrochloride	0.906853			Isoprene	0.974011			1,4-Cineole	0.946751			Sofalcone	0.945228			Rolapitant	0.786244			Rimantadine Hydrochloride	0.849289
Vanillic acid	0.941269			Regadenoson	0.957259			Lactitol	0.97599			Betrixaban	0.946751			Tegaserod Maleate	0.498579			Chloramphenicol sodium succinate	0.973097			Clindamycin alcoholate	0.932284			Sanguinarine chloride	0.505432			Gefarnate	0.902741			Desipramine Hydrochloride	0.819898
Fluorometholone	0.62058			Iopanoic acid	0.859996			Trimebutine maleate	0.801971			Erythromycin estolate	0.738331			1, 10-Phenanthroline monohydrate	0.6849			Pamabrom	0.802992			Xylazine	0.746328			Olmesartan	0.780871			(1R)-(-)-Menthyl acetate	0.782914			Bedaquiline	0.830048
Cefoperazone sodium	0.657505			Betahistine mesylate	1.03543			Dehydroepiandrosterone acetate	1.02965			Cinchocaine	1.04939			D-Ribose	0.980811			(-)-Sparteine Sulfate	1.05704			Triflupromazine hydrochloride	0.911726			Cytarabine hydrochloride	0.991361			p-Cymene	0.87446			Ammonium lactate	0.869015
Fluorescein	0.845873			Amodiaquine hydrochloride	0.927551			4-Aminophenol	0.963115			Moxifloxacin	0.98915			Sulfacetamide	0.997827			D-Pantothenate Sodium	1.02233			Dapagliflozin propanediol monohydrate	0.955287			Cinnamyl acetate	0.944056			Sodium cholate	0.934357			Benzalkonium chloride	0.732546
Disopyramide	0.887222			Hydrocortisone acetate	1.00753			Penicillin G Procaine	1.128			Tizanidine	0.999529			Hydroxylammonium chloride	0.934357			Tetrahydropalmatine	0.956479			Trimethadione	0.986257			Citronellal	0.946269			Diphenylamine Hydrochloride	1.02335			Amsacrine hydrochloride	0.863911
Lomefloxacin	0.892667			Ilaprazole sodium	0.996466			Salmeterol	1.01586			Tropisetron	0.972984			Ethyl gallate	0.983023			Midecamycin	1.0453			Tocofersolan	0.913937			Camphene	0.951033			(+)-Longifolene	1.0128			Cefotiam Hexetil Hydrochloride	1.05381
Econazole	0.967709			Ropivacaine	0.934187			Acetophenone	0.93657			Olprinone	1.01382			Amenamevir	0.950182			Ethacrynic Acid	0.927891			Anisole	0.977918			Vitamin A	0.975196			Hippuric acid	0.971452			Cefozopran hydrochloride	0.918191
Atropine sulfate	0.935378			2’-deoxyuridine	0.79993			Geraniol	0.942695			Landiolol hydrochloride	0.902027			Kasugamycin hydrochloride	0.864931			2-Hydroxybenzyl alcohol	0.784615			Tilmicosin phosphate	0.87378			α-Terpineol	0.830218			Betahistine	0.859827
Salbutamol	0.893519			Vortioxetine	0.630789			Doripenem	0.786827			Dimetridazole	0.784615			Lanatoside C	0.509464			Thioridazine hydrochloride	0.710765			Arabic gum	0.712466			(1S)-(-)-α-Pinene	0.711105			Cilastatin	0.783083			Emedastine Difumarate	0.805885
Iguratimod	0.969158			Diphenylpyraline hydrochloride	0.965576			Drofenine Hydrochloride	0.958085			Methyl linolenate	0.973392			Phthalylsulfathiazole	0.964436			Pravastatin	0.923566			Oxantel Pamoate	0.933987			Stearic acid	0.941151			Deferoxamine mesylate	0.932522			Citric acid	0.908585
Hydroxyzine pamoate	1.0338			Ertapenem sodium	0.974694			Moxisylyte hydrochloride	0.940012			Isoproterenol sulfate dihydrate	0.96525			Alvimopan dihydrate	0.968995			lurasidone	1.00091			Dichlorophene	1.00042			Midodrine hydrochloride	0.968278			Morantel tartrate	1.05139			Methyl Oleate	0.932847
	0			Omeprazole Sodium	0.944733			Fruquintinib	0.948316			Desoximetasone	0.962482			Fenipentol	0.956946			atorvastatin	0.963459			Triiodothyronine	0.907772			Midodrine	0.929916			Chlorpromazine	0.994885			D-Mannose	1.22122
Dexrazoxane	1.01882			Emedastine	0.960202			Isoxsuprine hydrochloride	0.9405			Tropic acid	0.932847			Carvedilol Phosphate	1.00058			Abemaciclib	0.825706			Tetryzoline	0.963296			Benzathine penicilline	0.98772			Dihydroergotamine Mesylate	0.95662			Sodium Dehydrocholate	0.941477
Elbasvir	1.04211			Tiaprofenic acid	0.981044			Chloropyramine hydrochloride	0.998956			Mexenone	1.01442			Raceanisodamine	0.994722			Acetohexamide	1.03885			Delapril Hydrochloride	0.990814			Diclofenac Epolamine	0.988697			Baricitinib phosphate	1.0623			Alfuzosin	1.3987
Indigo carmine	1.01866			Ranitidine	0.982347			Mivacurium chloride	0.99635			Levomilnacipran Hydrochloride	1.00417			Norgestrel	1.00645			Acrivastine	1.04243			Fosfosal	1.03217			Nebivolol	1.01654			Methyl Stearate	0.975996			Aliskiren	1.01784
Indacaterol	1.00954			Minaprine dihydrochloride	0.996025			Dolasetron Mesylate	0.939197			Isopropamide Iodide	0.949944			Ambroxol	0.987232			Ceftizoxime sodium	0.947501			Alimemazine Tartrate	0.983487			Palonosetron	0.925845			Isoeugenol	0.957923			Fenoterol hydrobromide	0.951084
Venlafaxine	1.0294			Orphenadrine Hydrochloride	0.943106			(-)-Verbenone	0.980719			Ketorolac tromethamine salt	0.988535							Glecaprevir	1.05122			Sebacic acid	0.998304			Quetiapine	0.895071			Methyl linoleate	0.980067			Fenoterol	0.965088
